# Supplementary material for: Effects by the Hard Water Boiling of Chalky Rice in Terms of Texture Improvement and Ca Fortification
Source: Preprints.org preprint supplement (doi:10.20944/preprints202306.0419.v1), 2023-06-06
Supplement: Supplementary file 3 [file supplementary]

## Sheet: S1
	Alfa	Beta	Endo	Endo	Proteinase	Surface	Overall	Surface	Overall	Surface	Surface	Overall	Surface	Overall	Glucose	Maltose	Saccharose
						layer		layer		layer	layer		layer
	Amylase	Amylase	Xylanase	Cellulase		Hardness	Hardness	Stickiness	Stickiness	Adhered	Balance	Balance	Balance	Balance
						(H 1)	(H 2)	(S 1)	(S 2)	(L 3)	(S1/H1)	(S2/H2)	(A3/A1)	(A6/A4)
α-Amylase	1
β-Amylase	0.319703	1
endo-Xylanase	0.0148236	-0.0127184	1
endo-Cellulase	0.413437	-0.244159	0.301179	1
Proteinase	0.393918	0.109644	0.422069	0.0343003	1
(H 1)	-0.221073	-0.503354	0.375029	0.258049	-0.375752	1
(H 2)	-0.528919	-0.427632	0.374577	-0.0308444	-0.323901	0.65 *	1
(S 1)	-0.70 *	-0.338552	0.220826	-0.482079	-0.0928524	0.163908	0.63 *	1
(S 2)	-0.279396	0.00532593	-0.209821	-0.428983	-0.00238188	-0.455076	-0.273195	0.405098	1
(L 3)	-0.439548	0.132136	-0.264609	-0.372104	-0.452624	-0.0617202	0.419454	0.419634	-0.0183886	1
(S1/H1)	-0.434421	-0.05114	-0.0495698	-0.531215	0.233341	-0.55749	0.0508509	0.70 *	0.67 *	0.29988	1
(S2/H2)	0.207426	0.282457	-0.387469	-0.234132	0.259607	-0.71 **	-0.82 **	-0.196131	0.74 **	-0.390232	0.348807	1
(A3/A1)	-0.201421	0.167531	-0.142395	-0.440239	0.337808	-0.80 **	-0.231396	0.428266	0.63 *	0.259565	0.93 **	0.503575	1
(A6/A4)	-0.190141	0.0734794	0.0679448	-0.380465	0.491609	-0.65 *	-0.302448	0.439081	0.74 **	-0.0998269	0.86 **	0.63 *	0.86 **	1
Glucose cntent	-0.249869	0.357753	-0.252025	-0.67 *	0.340166	-0.74 **	-0.46658	0.270164	0.70 *	0.0392047	0.72 **	0.73 **	0.78 **	0.84 **	1
Maltose content	-0.204495	0.360362	-0.0692056	-0.58 *	0.388827	-0.68 *	-0.437834	0.227324	0.77 **	-0.139461	0.68 *	0.77 **	0.73 **	0.82 **	0.92 **	1
Saccharose content	-0.180667	0.232027	-0.162323	-0.58 *	0.363804	-0.76 **	-0.420863	0.292353	0.78**	-0.0533549	0.82 **	0.75**	0.87 **	'0.89 **	0.90 **	0.95 **	1

## Sheet: S2
			ΔE*(ab)
		Kumasannokagayaki (purified water)	3.32 ± 0.06 a
		Kumasannokagayaki (evian)	3.58 ± 0.16 a
		Kumasannokagayaki (contrex)	3.03 ± 0.19 b
		Tsukiakari (purified water)	4.10 ± 0.37 a
		Tsukiakari (evian)	4.62 ± 0.04 b
		Tsukiakari (contrex)	4.29 ± 0.06 c
		Koshihikari A (purified water)	4.66 ± 0.11 a
		Koshihikari A (evian)	3.80 ± 0.01 b
		Koshihikari A (contrex)	4.17 ± 0.07 c
		Sasashigure A (purified water)	3.24 ± 0.02 a
		Sasashigure A (evian)	4.09 ± 0.27 b
		Sasashigure A (contrex)	4.17 ± 0.10 b
		Hitomebore (purified water)	4.50 ± 0.07 a
		Hitomebore (evian)	4.88 ± 0.08 b
		Hitomebore (contrex)	3.86 ± 0.25 c
		Yosakoibijin (purified water)	6.02 ± 0.25 a
		Yosakoibijin (evian)	4.56 ± 0.21 b
		Yosakoibijin (contrex)	4.46 ± 0.25 b
		Koshihikari B (purified water)	4.52 ± 0.12 a
		Koshihikari B (evian)	6.19 ± 0.00 b
		Koshihikari B (contrex)	3.57 ± 0.15 c
		Sasashigure B (purified water)	3.62 ± 0.16 a
		Sasashigure B (evian)	3.67 ± 0.14 a
		Sasashigure B (contrex)	3.47 ± 0.53 a
		Morinokumasan (purified water)	6.04 ± 0.06 a
		Morinokumasan (evian)	5.48 ± 0.15 b
		Morinokumasan (contrex)	4.00 ± 0.15 c
		Yumeshizuku (purified water)	3.73 ± 0.01 a
		Yumeshizuku (evian)	4.36 ± 0.47 b
		Yumeshizuku (contrex)	3.94 ± 0.35 c
